# Supplementary material
Source: PubMed Central journal article supplement (PMC3592379)
Supplement: Supp_Fig2.pdf [file Supp_Fig2.pdf]

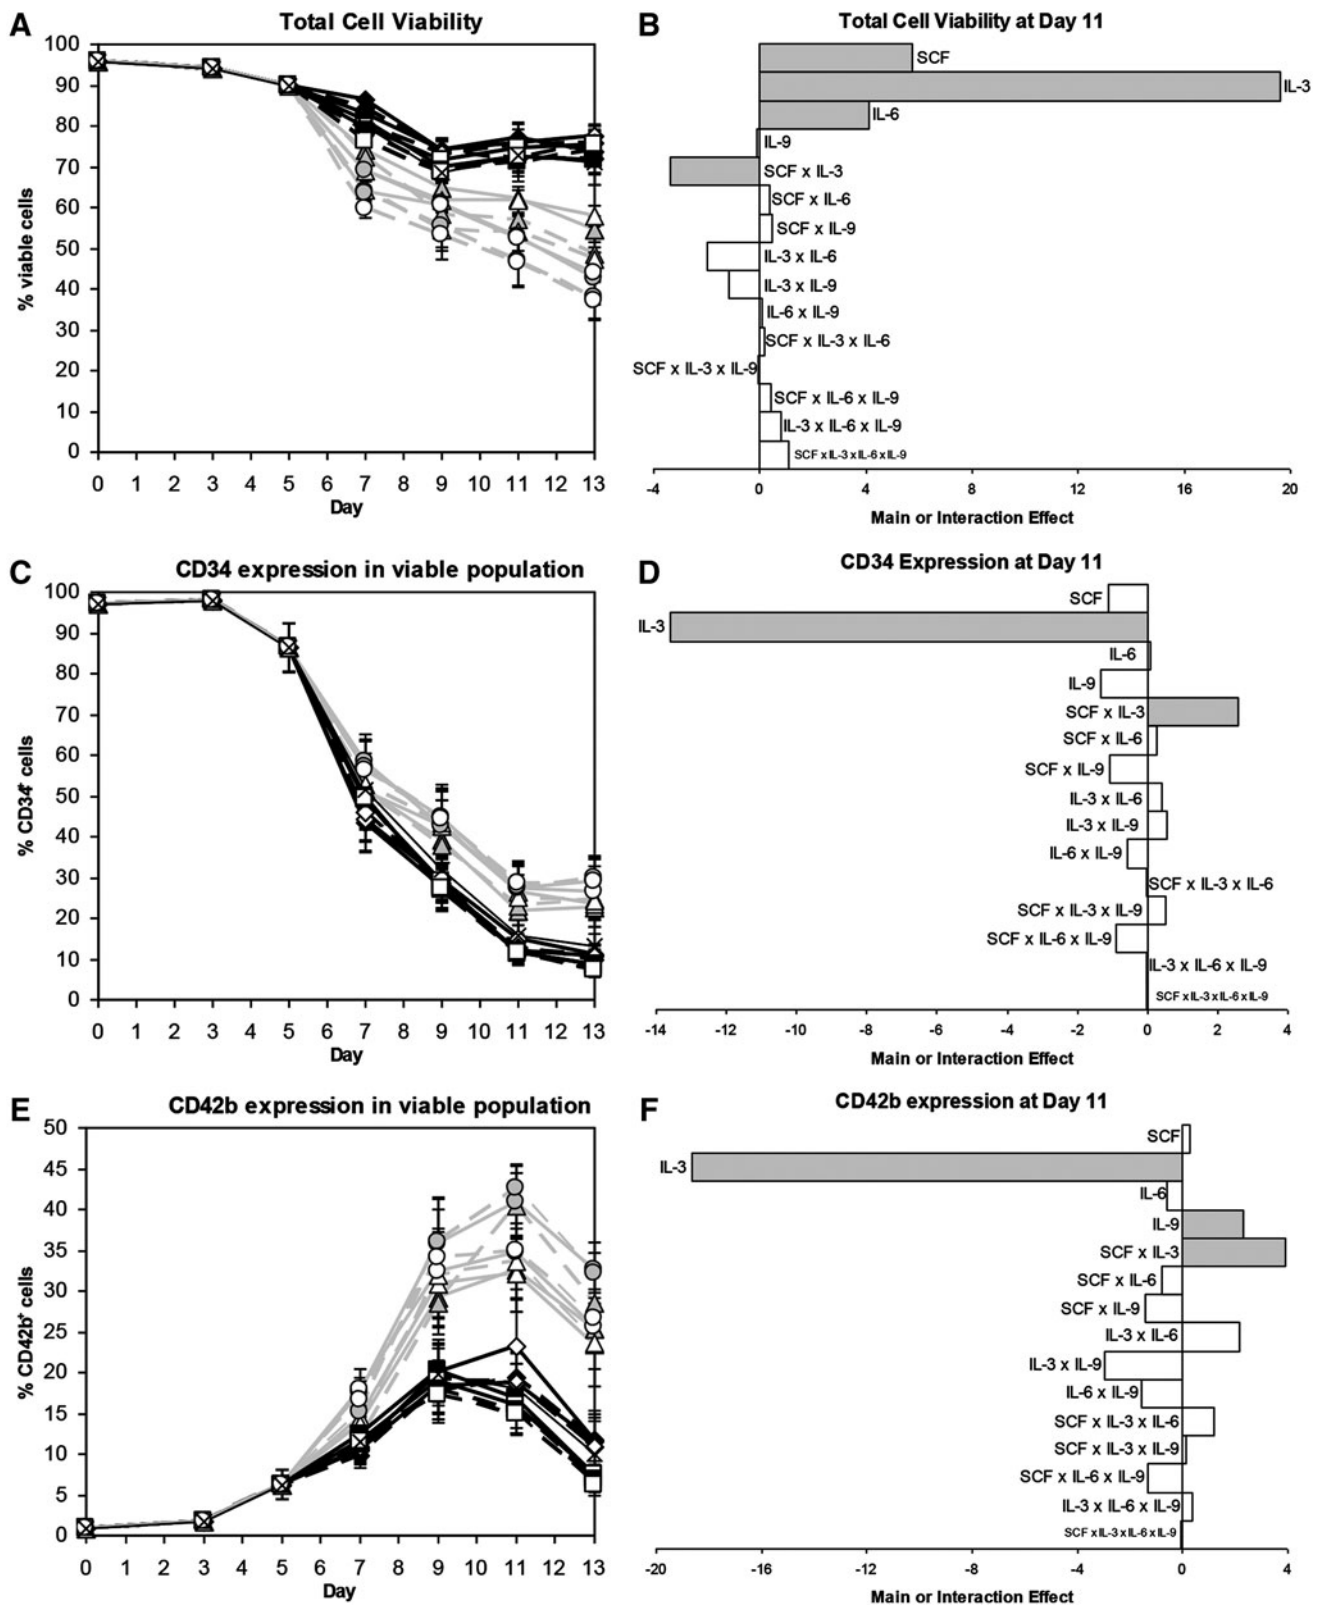

**SUPPLEMENTARY FIG. S2.** Viability and CD34 and CD42b expression for 2<sup>4</sup> factorial design of experiments. Effects of 17 cocktails on (A, B) total cell viability, (C, D) CD34 expression, and (E, F) CD42b expression. (A, C, E) Cytokine cocktails are indicated by symbol and line combinations (e.g., open black diamond and solid black line), as shown in Table 1. Data represent the mean ± standard error (SEM) for *n* = 5 donors. (B, D, F) Main and interaction cytokine effects at day 11; significant effects (*p* < 0.05) are shaded gray.
