# Supplementary material
Source: PubMed Central journal article supplement (PMC3592379)
Supplement: Supp_Fig3.pdf [file Supp_Fig3.pdf]

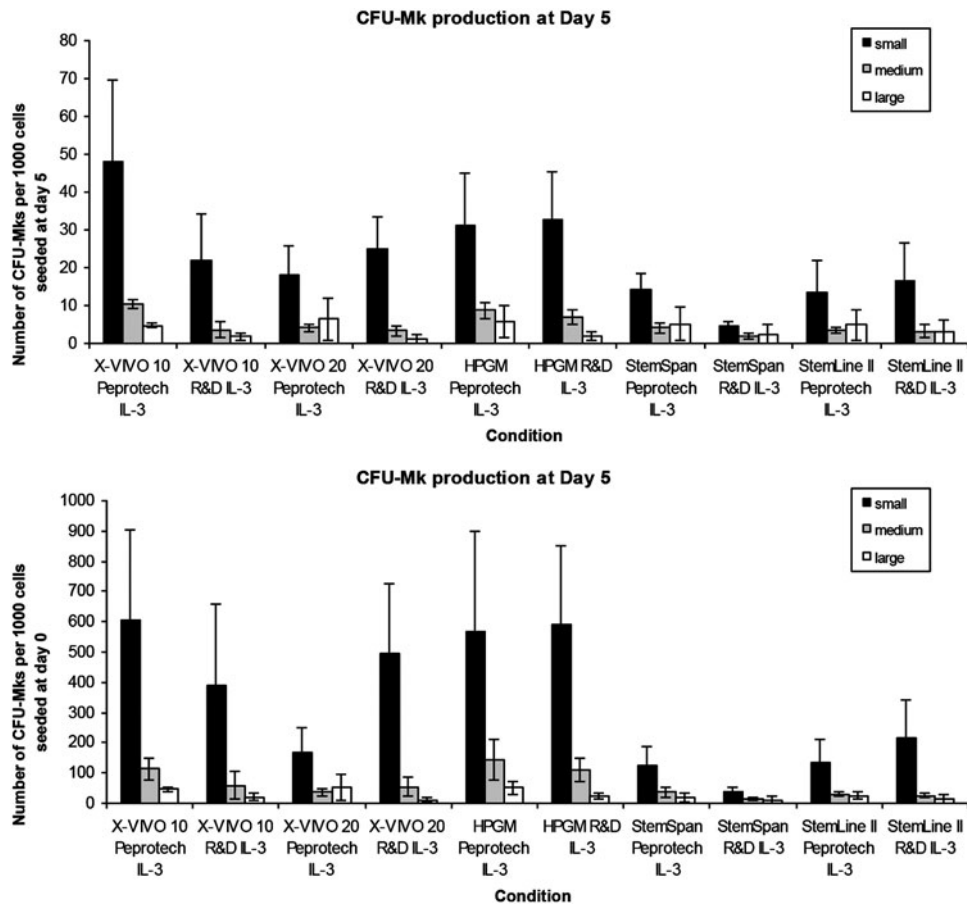

**SUPPLEMENTARY FIG. S3.** Mk colony production after culture with different serum-free media and IL-3 sources. CD34<sup>+</sup> HSPCs were cultured in X-VIVO 10, X-VIVO 20, hematopoietic progenitor growth medium (HPGM), StemSpan H3000, or StemLine II media with IL-3 from Peprotech or R&D Systems. Cells were cultured for 5 days with cocktail “c” (Table 1) at 5% O<sub>2</sub>/pH 7.2 and then seeded into colony-forming unit (CFU)-Mk assays. Mk colonies were enumerated and scored as small (3–20 cells/colony), medium (21–49 cells), or large (>50 cells). Data are presented as the number of colonies produced per 1000 cells seeded on day 5 (top) or per 1000 input cells on day 0 (bottom), and represent the average ± SEM for *n*=3 donors.
