# Supplementary material
Source: PubMed Central journal article supplement (PMC3592379)
Supplement: Supp_Fig6.pdf [file Supp_Fig6.pdf]

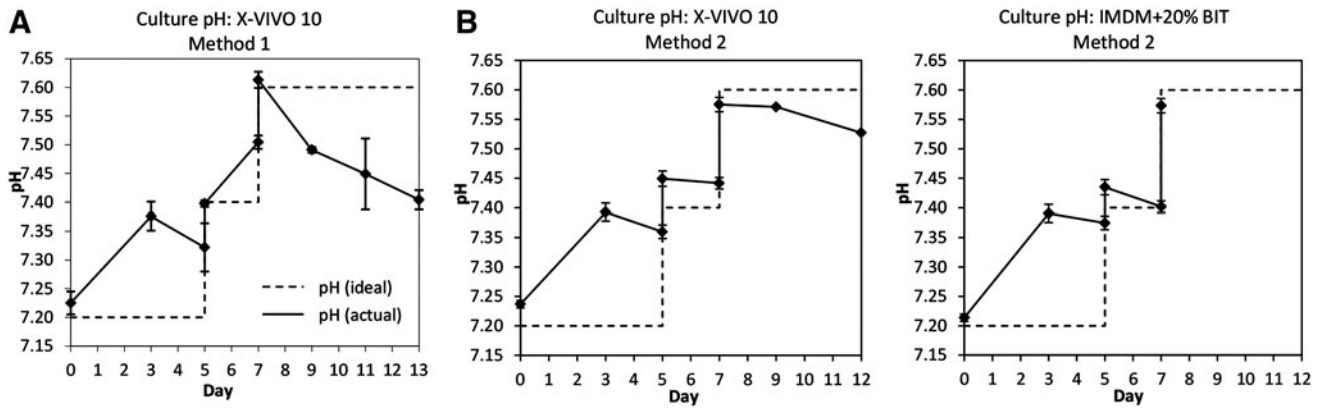

**SUPPLEMENTARY FIG. S6.** Physiological drifts in culture pH. CD34<sup>+</sup> HSPCs were seeded in X-VIVO 10 with cocktail “c” (Table 1) using IL-3 from R&D Systems and maintained at 5% O<sub>2</sub> and pH 7.2. On day 5, cells were washed, resuspended at pH 7.4/20% O<sub>2</sub>, and supplemented with cocktail 3 (Table 1). On day 7, cells were washed and resuspended in media adjusted to pH 7.6 and supplemented with cocktail 3. Method 1 (**A**) or Method 2 (**B**) was used to measure pH during the culture period. Data represent the mean ± SEM for *n*=2 donors.
