# Supplementary material
Source: PubMed Central journal article supplement (PMC3592379)
Supplement: Supp_Fig8.pdf [file Supp_Fig8.pdf]

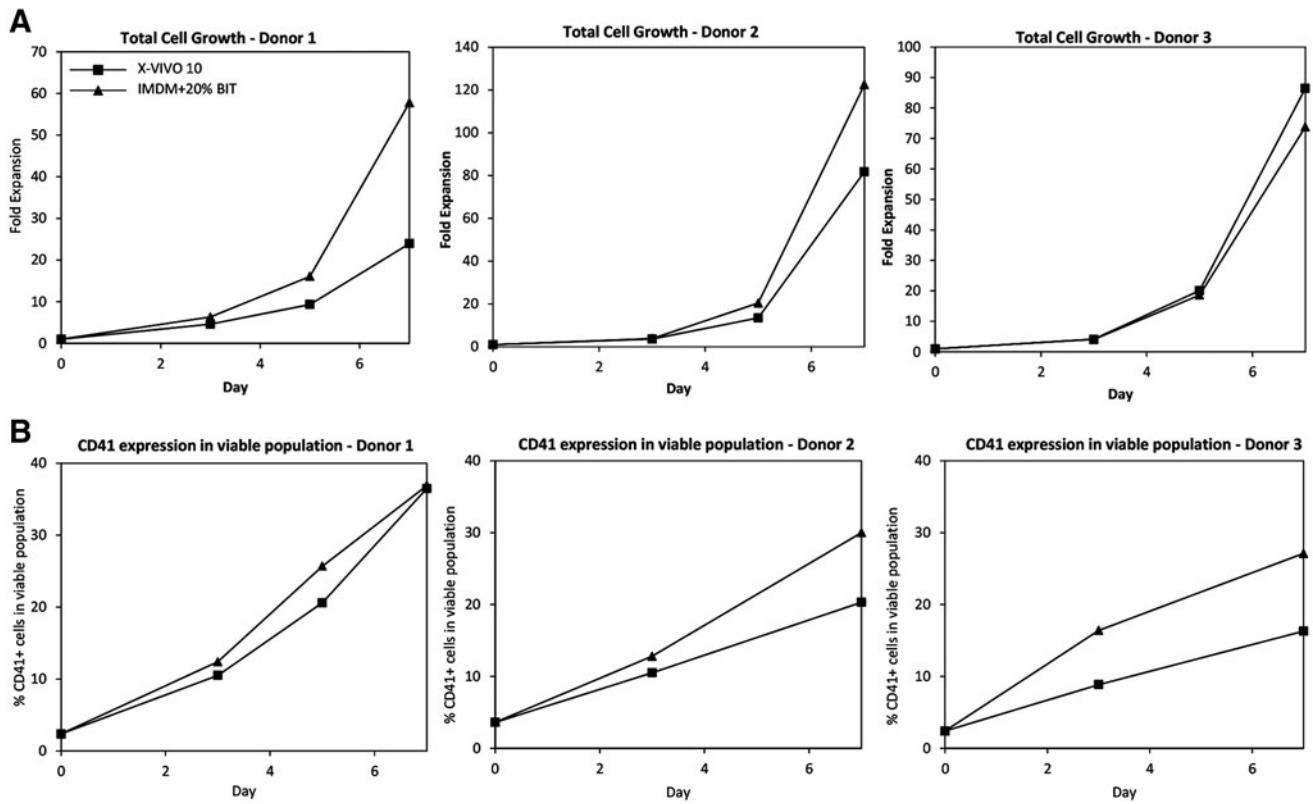

**SUPPLEMENTARY FIG. S8.** Fold-expansion (**A**) and CD41 expression (**B**) for X-VIVO 10 and Iscove's modified Dulbecco's medium (IMDM)+20% BSA, insulin and transferin (BIT). CD34<sup>+</sup> HSPCs were cultured in X-VIVO 10 or IMDM+20% BIT media supplemented with cocktail "c" (Table 1) at 5% O<sub>2</sub> and pH 7.2 until day 5 and then in cocktail "3" (Table 1) at 20% O<sub>2</sub> and pH 7.4 until day 7.
