# Supplementary material
Source: PubMed Central journal article supplement (PMC3592379)
Supplement: Supp_Fig9.pdf [file Supp_Fig9.pdf]

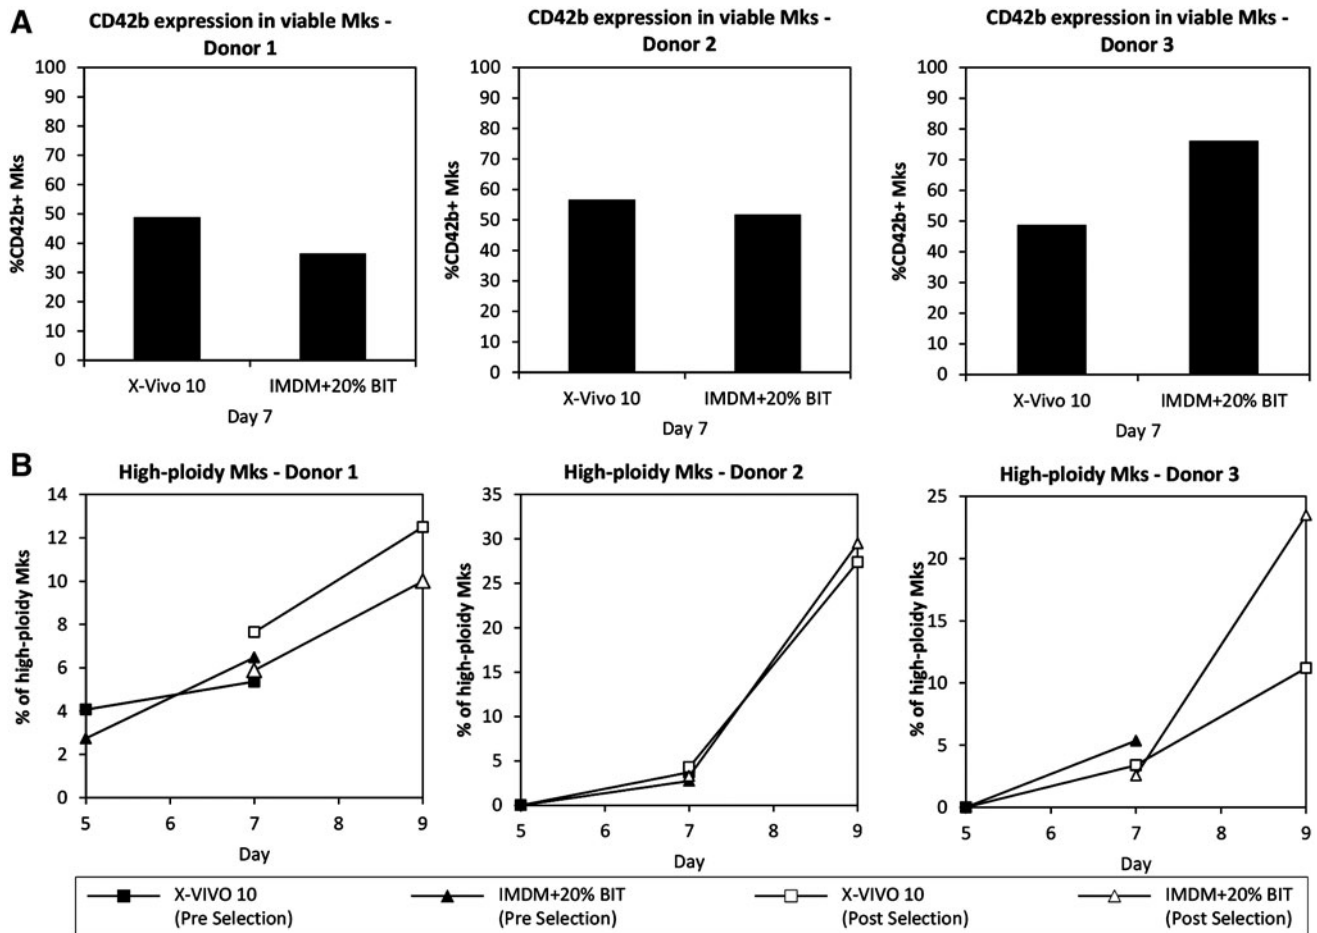

**SUPPLEMENTARY FIG. S9.** CD42b expression (**A**) and high-ploidy (>4N) content (**B**) in the Mk population for X-VIVO 10 and IMDM+20% BIT. CD34<sup>+</sup> HSPCs were cultured in X-VIVO 10 or IMDM+20% BIT media supplemented with cocktail "c" (Table 1) at 5% O<sub>2</sub> and pH 7.2 until day 5 and then in cocktail "3" (Table 1) at 20% O<sub>2</sub> and pH 7.4 until day 7. To increase Mk density and concentration, CD61<sup>+</sup> cells were selected at day 7. Cells were then resuspended in media adjusted to pH 7.6 and supplemented with 100 ng/mL Tpo, 100 ng/mL SCF, and 6.25 mM Nic. Symbols for (**B**): squares, X-VIVO 10; triangles, IMDM+20% BIT; closed symbols, before CD61 selection; open symbols, after CD61 selection.
