# Supplementary material
Source: PubMed Central journal article supplement (PMC3592379)
Supplement: Supp_Fig10.pdf [file Supp_Fig10.pdf]

**A**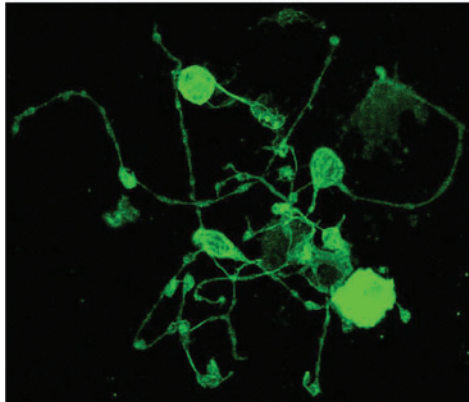**B**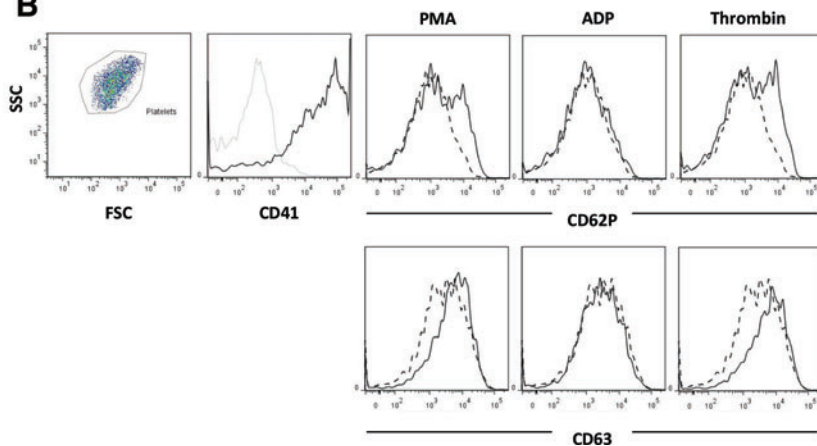

**SUPPLEMENTARY FIG. S10.** Proplatelet formation and functional activity of PLPs derived from Donor 1 CD34<sup>+</sup> HSPCs cultured with IMDM + 20% BIT. On day 7, selected Mks were seeded in tissue culture-treated well plates and on fibrinogen-coated chamber slides. **(A)** Proplatelet-forming cells were fixed and stained for  $\beta$ -tubulin on day 11. **(B)** To harvest platelets, cultures were placed on an orbital shaker set to 50 rpm on day 10. On day 12, the supernatant was collected and the culture surface was washed once with warm PBS. The combined volumes were pipetted 10 times with a 1000- $\mu$ L pipette before platelet isolation and activation with 150 nM phorbol-12-myristate-13-acetate (PMA), 20  $\mu$ M adenosine diphosphate (ADP), and 3 U/mL thrombin. Unactivated and activated PLPs were analyzed for CD62P and CD63 expression. For CD41 histogram: gray line, isotype; black line, sample. For CD62P and CD63 histograms: dotted line, unactivated sample; solid line, activated sample.
