# Supplementary material
Source: PubMed Central journal article supplement (PMC3592379)
Supplement: Supp_Fig11.pdf [file Supp_Fig11.pdf]

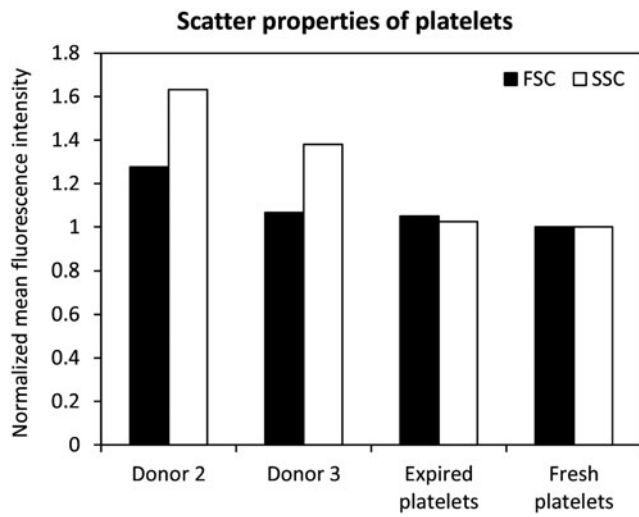

**SUPPLEMENTARY FIG. S11.** Size and granularity comparison of culture-derived, fresh, and expired platelets. Mean forward scatter (FSC) and side scatter (SSC) values for particles that fell inside the platelet gate (Fig. 8) were normalized to those obtained for fresh platelets.
