# Supplementary material
Source: PubMed Central journal article supplement (PMC3592379)
Supplement: Supp_Methods.pdf [file Supp_Methods.pdf]

## Supplementary Data

### Supplementary Methods

#### *Preparation of fresh and expired platelets*

Peripheral blood from normal donors was collected into sodium citrate Vacutainer tubes (BD Biosciences) under a protocol approved by the Northwestern University Institutional Review Board. Within 30 min of collection, blood was centrifuged at 800 *g* for 5 min with no brake. The platelet-rich plasma was transferred to a polypropylene conical tube and an equal volume of HEP buffer (140 mM NaCl, 2.7 mM KCl, 3.8 mM HEPES, 5 mM EDTA, pH 7.4) was added. The tube was centrifuged at 100 *g* for 10 min to pellet any contaminating red and white blood cells. Approximately 2/3 of the

platelet-rich plasma was centrifuged at 1000 *g* for 10 min to remove the platelet-poor plasma. One milliliter of modified HEPES/Tyrode's (HT) buffer (10 mM HEPES, 137 mM NaCl, 2.8 mM KCl, 1 mM MgCl<sub>2</sub>, 12 mM NaHCO<sub>3</sub>, 0.4 mM Na<sub>2</sub>HPO<sub>4</sub>, 0.35% BSA, 5.5 mM glucose, pH 7.4) was gently added twice to remove any remaining platelet-poor plasma on top of the platelet pellet. The platelet pellet was gently re-suspended in HT buffer. Before analysis, CaCl<sub>2</sub> was added to a final concentration of 2 mM. Six-day-old, 200- to 300-mL apheresis platelet units, which had expired at midnight on the fifth day of storage, were obtained from the Northwestern Memorial Hospital Blood Bank. Platelets were isolated from the platelet-rich plasma as described above.
